# Supplementary material for: Reduced Amygdala Response in Youths With Disruptive Behavior Disorders and Psychopathic Traits: Decreased Emotional Response Versus Increased Top-Down Attention to Nonemotional Features
Source: Atypon-hosted journal article supplement (doi:10.1176/appi.ajp.2012.11081270), 2012-03-28
Supplement: appi.ajp.2012.11081270.ds001.pdf [file appi.ajp.2012.11081270.ds001.pdf]

Supplemental Table 1: Task performance by group

|                     | <u>Accuracy</u> | <u>Response Time</u> |
|---------------------|-----------------|----------------------|
| Task Condition      | % correct (SE)  | milliseconds (SE)    |
| Youth with DBD+PT   |                 |                      |
| Neutral (Low load)  | .86 (.03)       | 504.62 (28.83)       |
| Neutral (High load) | .70 (.04)       | 627.59 (36.69)       |
| Fear (Low load)     | .86 (.03)       | 530.88 (29.70)       |
| Fear (High load)    | .66 (.05)       | 603.85 (36.28)       |
| Healthy Youth       |                 |                      |
| Neutral (Low load)  | .91 (.02)       | 509.51 (27.08)       |
| Neutral (High load) | .65 (.04)       | 597.40 (34.46)       |
| Fear (Low load)     | .90 (.03)       | 525.90 (27.90)       |
| Fear (High load)    | .62 (.05)       | 594.87 (34.08)       |

SE = Standard Error
